# Supplementary material for: The WNT/β-catenin pathway regulates expression of the genes involved in cell cycle progression and mitochondrial oxidative phosphorylation in the postmitotic cardiac myocytes
Source: PubMed Central journal article supplement (PMC8874274; doi:10.20517/jca.2021.35), 2022-01-28
Supplement: NIHMS1775796-supplement-Supplementary_Material.pdf [file NIHMS1775796-supplement-Supplementary_Material.pdf]

# A. CTNNB1 loss of function

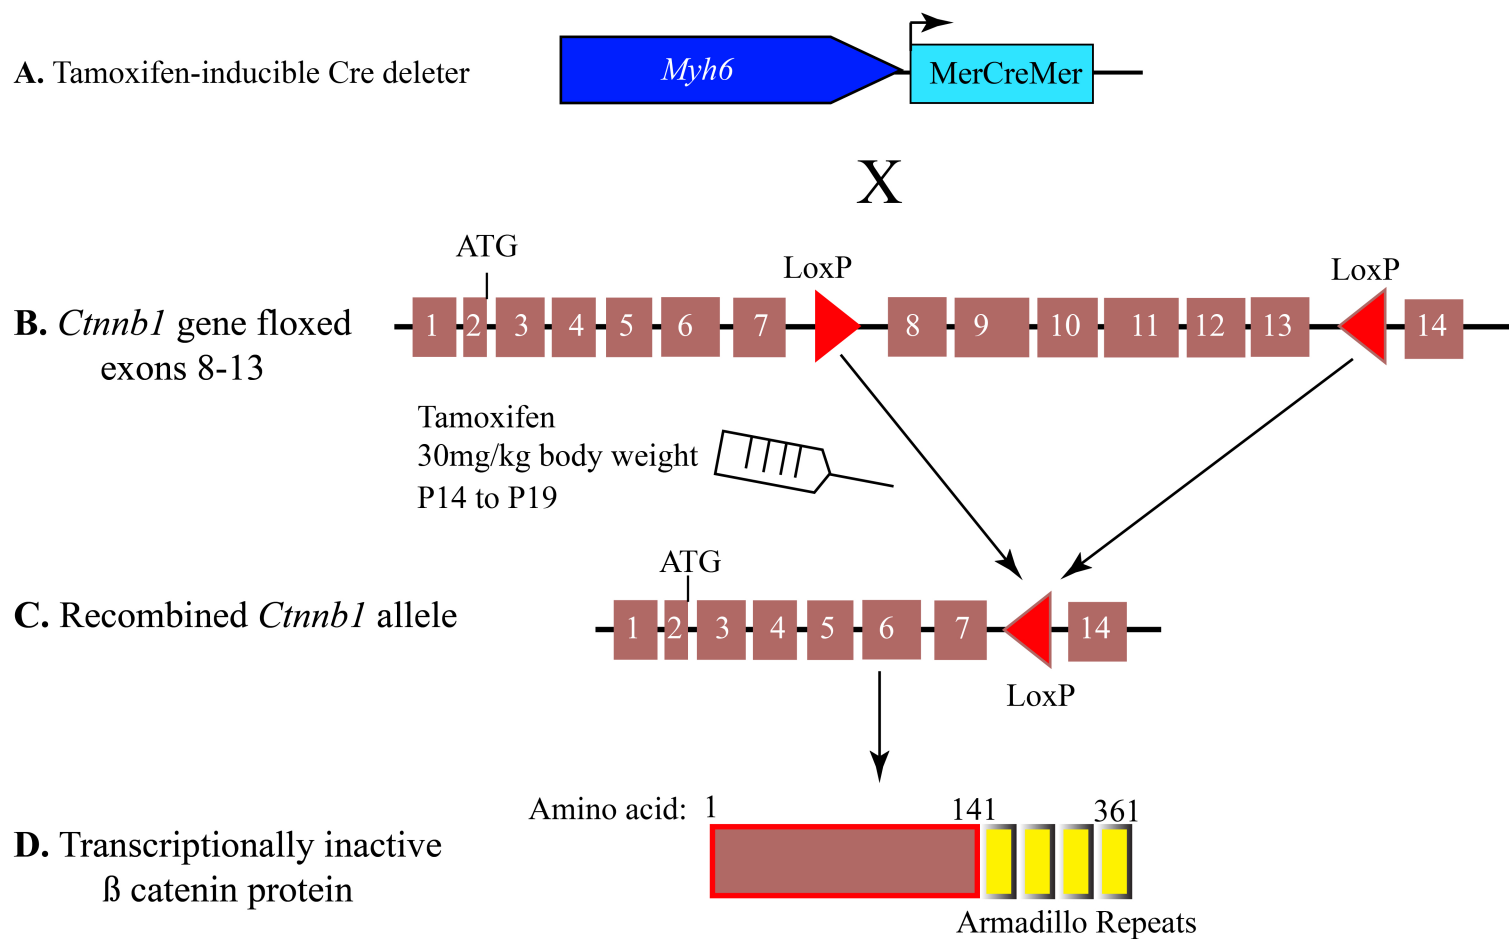

# B. CTNNB1 gain of function

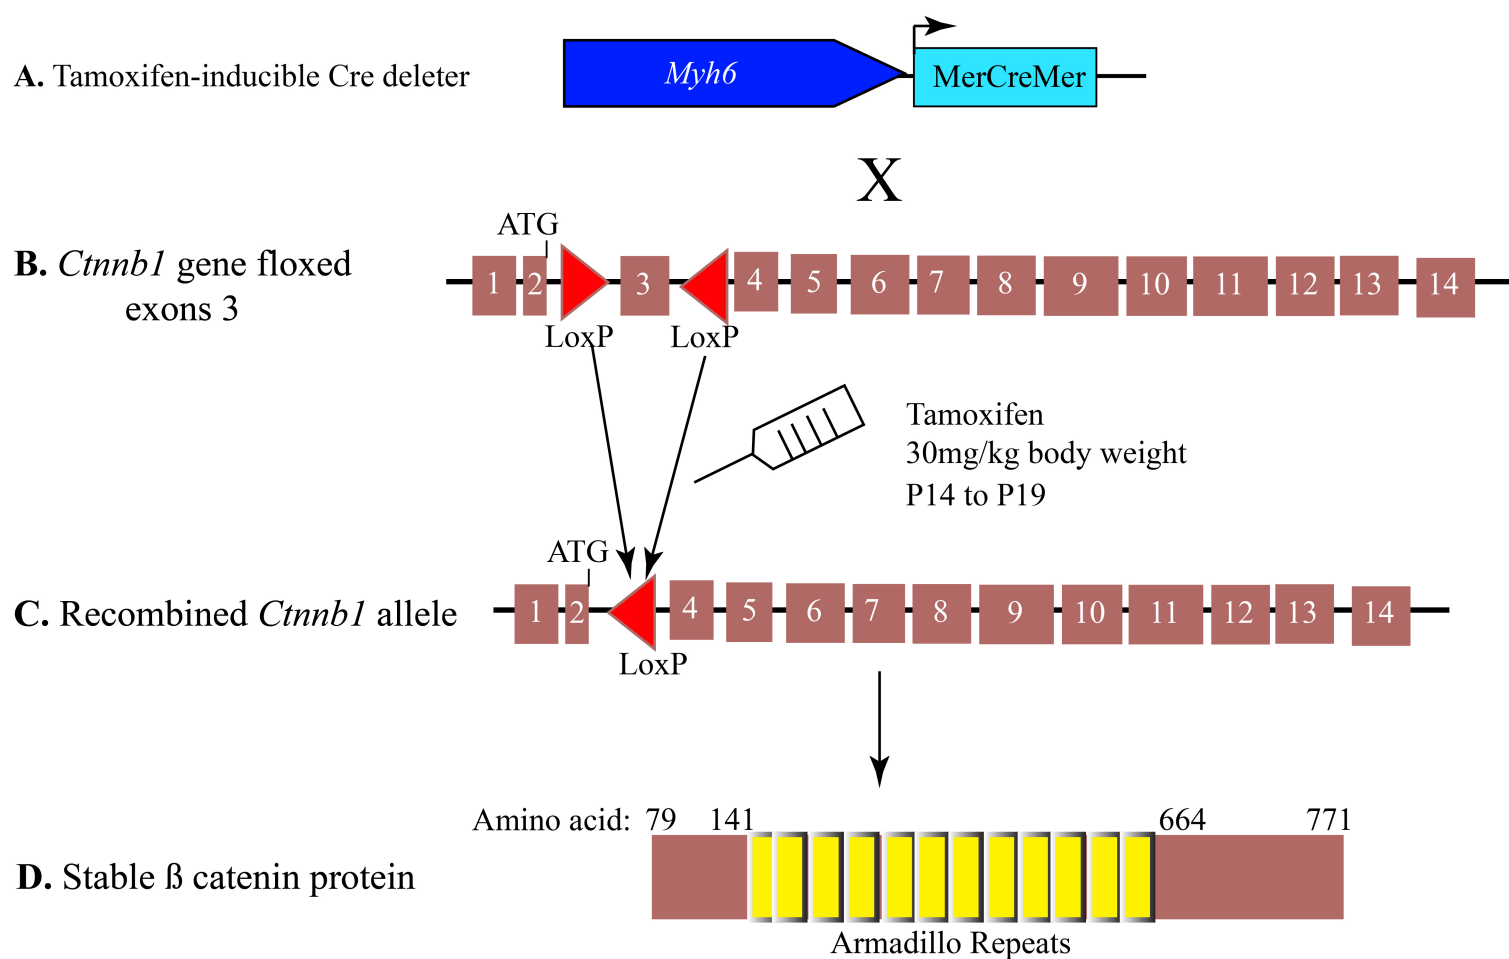

**Online Figure 1.** Schematic illustration of loss of function and gain of function  $\beta$  catenin mice using *Myh6*-*MerCreMer* and *Ctnnb1* floxed alleles

A

*Myh6-Mcm:Ctnnb1<sup>LoF</sup>* vs. Wild type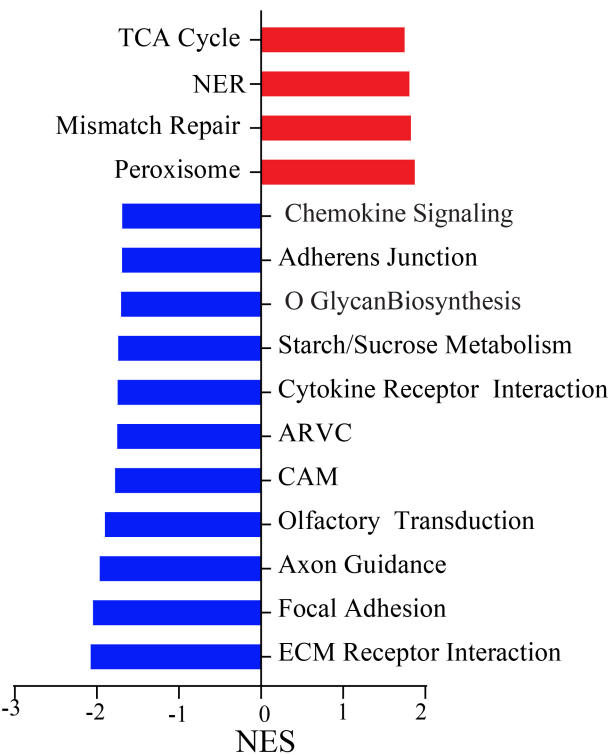

B

*Myh6-Mcm:Ctnnb1<sup>GoF</sup>* vs. Wild type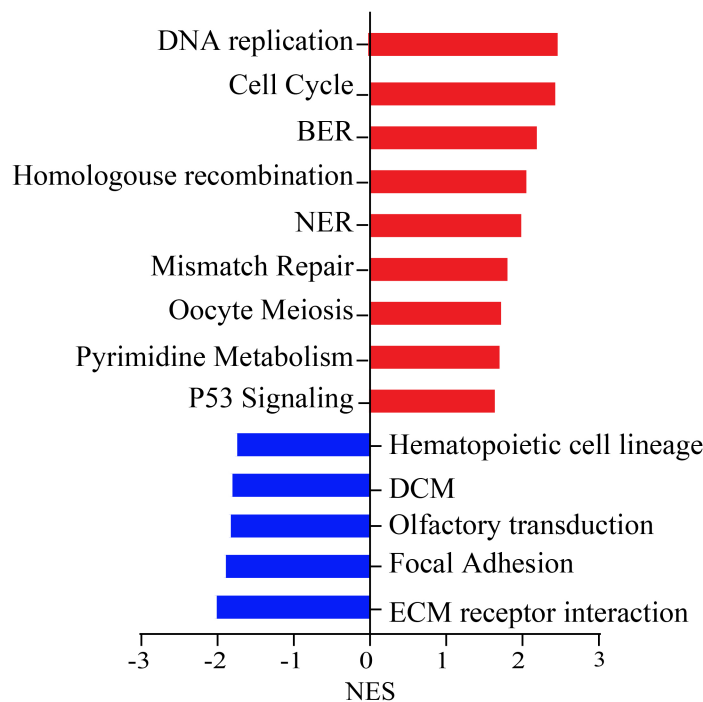

C

*Myh6-Mcm:Ctnnb1<sup>LoF</sup>* vs. *Myh6-Mcm:Ctnnb1<sup>GoF</sup>*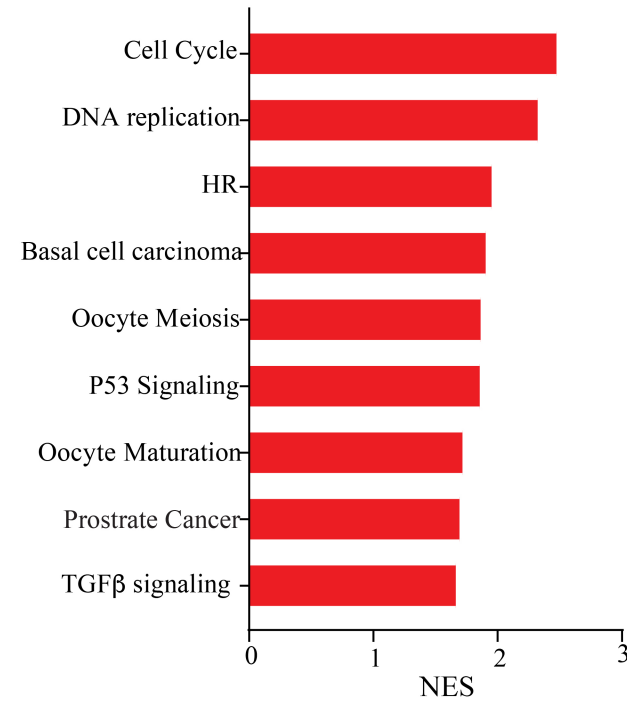

**Online Figure 2.** Biological pathways predicted to be dysregulated in the myocytes isolated from the *Myh6-Mcm:Ctnnb1<sup>LoF</sup>* (A), *Myh6-Mcm:Ctnnb1<sup>GoF</sup>* (B) compared to myocytes isolated from the wild type mice. Panel C depicts the predicted biological pathways dysregulated when comparing the DEGs in the myocytes from the *Myh6-Mcm:Ctnnb1<sup>LoF</sup>* and *Myh6-Mcm:Ctnnb1<sup>GoF</sup>* mice. The NES values are depicted only for pathways that had a q-value of <0.05.

#### Abbreviations:

NES: Normalized enrichment score.

TCA: tricarboxylic acid

NER: Nucleotide excision repair

ARVC: Arrhythmogenic right ventricular cardiomyopathy

CAM: Crassulacean acid metabolism

ECM: Extracellular matrix

BER: Base excision repair

DCM: Dilated cardiomyopathy

HR: Homologous recombination

TGFβ: Transforming growth factor beta

**A** *Myh6-Mcm:Ctnnb1<sup>LoF</sup>* vs. Wild type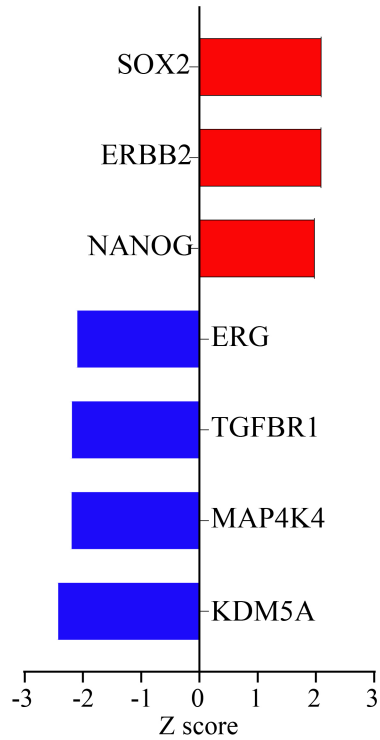**B** *Myh6-Mcm:Ctnnb1<sup>GoF</sup>* vs. Wild type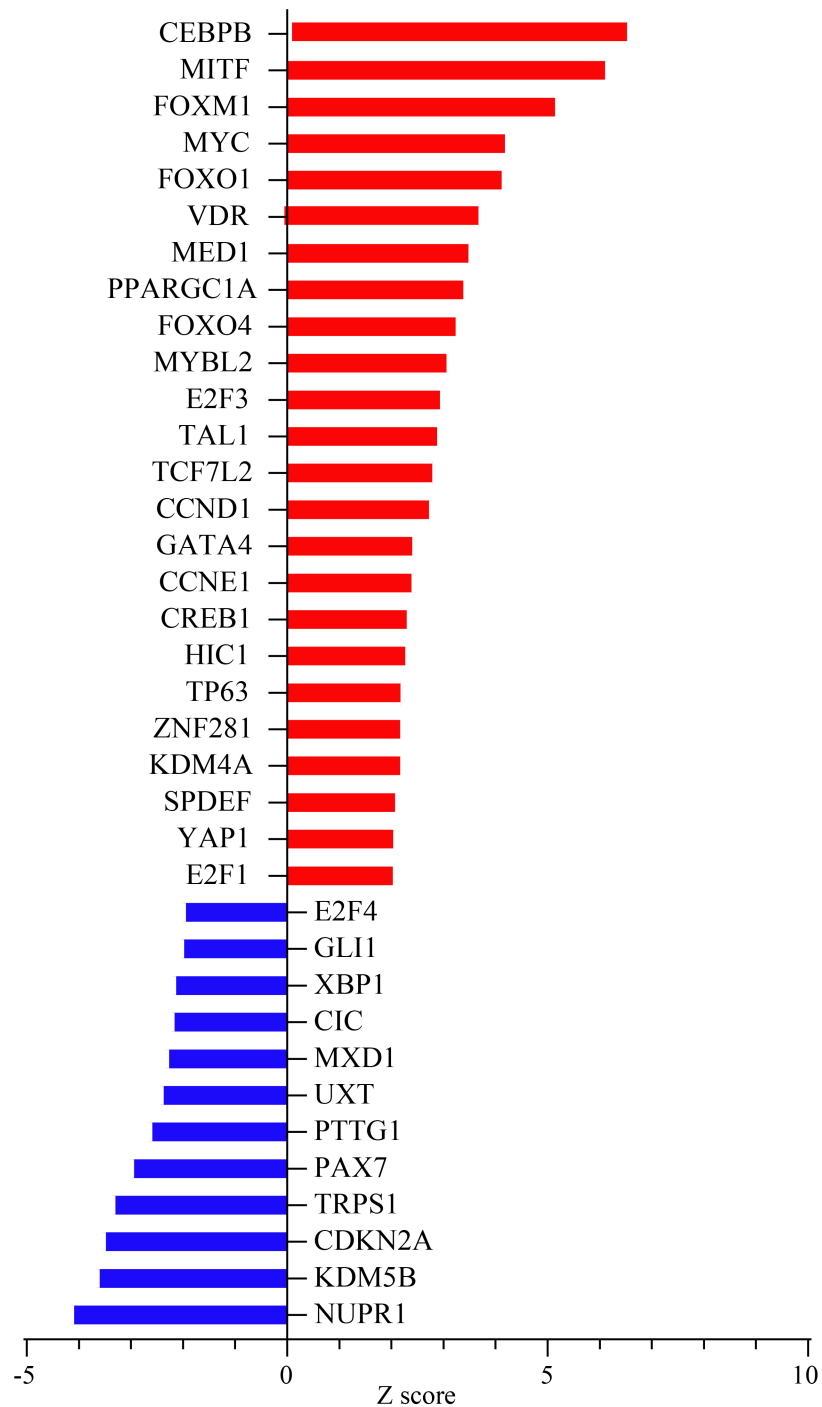**C** *Myh6-Mcm:Ctnnb1<sup>LoF</sup>* vs. *Myh6-Mcm:Ctnnb1<sup>GoF</sup>*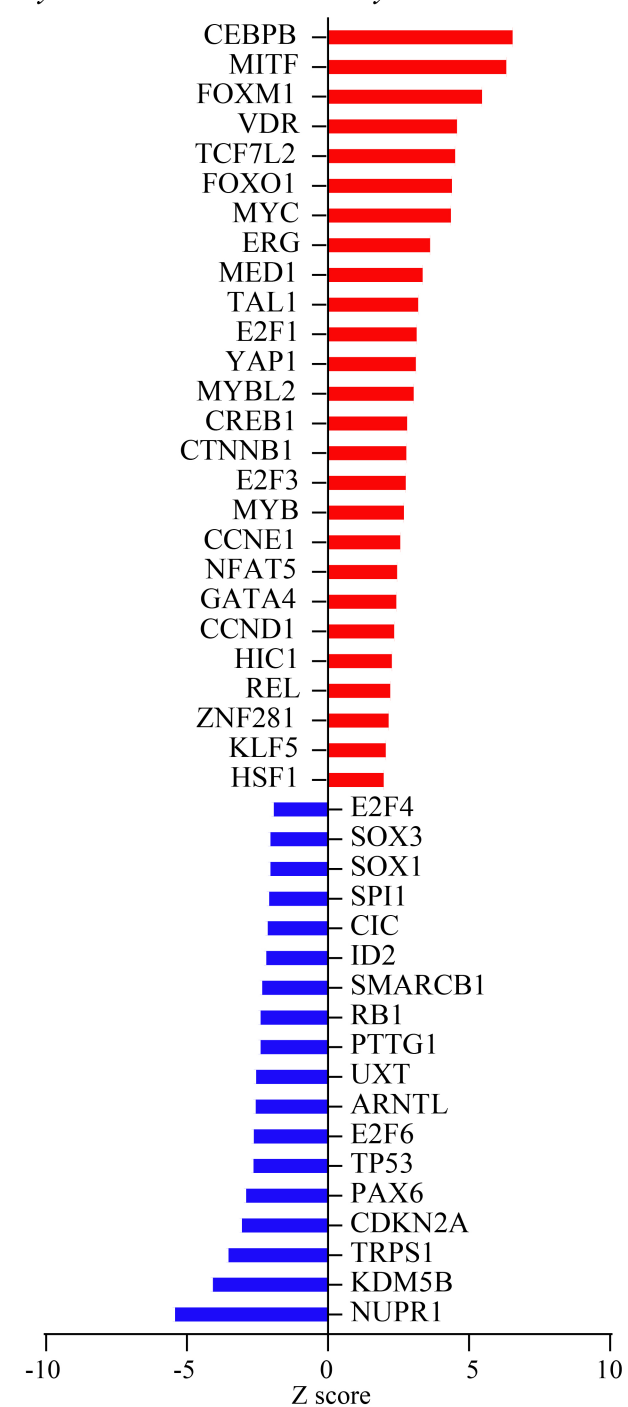

**Online Figure 3.** Transcriptional regulators of gene expression predicted to be dysregulated in the myocytes isolated from the *Myh6-Mcm:Ctnnb1<sup>LoF</sup>* (A) *Myh6-Mcm:Ctnnb1<sup>GoF</sup>* (B) compared to myocytes isolated from the wild type mice. Panel C depicts predicted transcriptional regulators of the DEGs the myocytes from the *Myh6-Mcm:Ctnnb1<sup>LoF</sup>* and *Myh6-Mcm:Ctnnb1<sup>GoF</sup>* mice.

**Online Table 1: Oligonucleotide Primers, Antibodies, and TaqMan probes**

**Genotyping primers:**

| Gene                   | Forward sequence      | Reverse sequence            |
|------------------------|-----------------------|-----------------------------|
| <i>Cre recombinase</i> | TCTATTGCACACAGCAATCCA | CCAGCATTGTGAGAACAAGG        |
| <i>Ctnnb1(Ex3)</i>     | AGACTGCCTTGGGAAAAGCGC | TGGATGGGATCTGCATGCCCTCATCTA |
| <i>Ctnnb1(Ex8-13)</i>  | TGCAGCTTACCTGACTCCTG  | CCTGTTAGCCCTCATGGTGT        |

**List of antibodies**

| Antibodies                          | Concentration             | Supplier                  | Catalog number |
|-------------------------------------|---------------------------|---------------------------|----------------|
| Anti-mouse IgG HRP linked antibody  | 1:4000 (IB)               | Cell Signaling Technology | 7076           |
| Anti-Rabbit IgG HRP linked antibody | 1:2000 (IB)               | Cell Signaling Technology | 7074           |
| Donkey anti Rat Alexa Fluor 594     | 1:1000 (IF)               | Invitrogen                | A11007         |
| Goat anti Mouse Alexa Fluor594      | 1:1000 (IF)               | Invitrogen                | A11005         |
| Goat anti Rabbit Alexa Fluor 488    | 1:1000 (IF)               | Invitrogen                | A11012         |
| GAPDH                               | 1:1000 (IB)               | Cell Signaling Technology | 2118           |
| Vinculin                            | 1:10000 (IB)              | Abcam                     | Ab129002       |
| CTNNB1 (C-terminal)                 | 1:1000 (IB)<br>1:100 (IF) | Cell Signaling Technology | 8480S          |
| CTNNB1 (N-terminal)                 | 1:1000 (IB)               | Cell Signaling Technology | 9562S          |
| CTNNB1                              | 1:50 (IF)                 | Cell Signaling Technology | 9561S          |
| Ki-67                               | 1:250 (IF)                | Abcam                     | ab15580        |
| Phospho Histone H3                  | 1:1000 (IF)               | Abcam                     | ab10543        |
| PCM1                                | 1:1000 (IF)               | Sigma                     | HPA023370      |
| PCM1                                | 1:50 (IF)                 | Santa Cruz                | Sc-398365      |
| PLIN                                | 1:100 (IF)                | Cell signaling            | 9349           |

**Oligonucleotide primers used in qPCR reactions**

| Name                      | Sequence                                                       |
|---------------------------|----------------------------------------------------------------|
| <i>Gapdh</i>              | Forward: AACTTTGGCATTGTGGAAGG<br>Reverse: GGATGCAGGGATGATGTTCT |
| <i>Ctnnb1 GOF (ex3)</i>   | Forward: AGTCCTTCACGCAAGAGCAA<br>Reverse: CAAACTGCGTGGATGGGATC |
| <i>Ctnnb1 GOF (ex3-4)</i> | Forward: TTCCCAGTCCTTCACGCAAG<br>Reverse: TGCCCTCATCTAGCGTCTCA |



|                             |                                                                     |
|-----------------------------|---------------------------------------------------------------------|
| <i>Ctnnb1 LOF (ex9)</i>     | Forward: TCTTGTACGCACCGTCCTTC<br>Reverse: CCATAATGAAGGCGAACGGC      |
| <i>Ctnnb1 LOF (ex12-13)</i> | Forward: ACTCCAGGAATGAAGGCGTG<br>Reverse: TGGTCAGCTCGACTGAAAGC      |
| <i>Ccnb1</i>                | Forward: GTGCCGCCTGTACATAGGAT<br>Reverse: TCGACAACCTCCGTTAGCCT      |
| <i>E2f1</i>                 | Forward: CCACGAGGCCCTTGACTATC<br>Reverse: ACACCCTGAATCCCTAGGCT      |
| <i>Aurka</i>                | Forward: GAGCTACCGGGATCGCTTG<br>Reverse: CCGAAGGGAACAGTGGTCTT       |
| <i>Ccnb2</i>                | Forward: CTATCCGGCGGGCAGTTTTA<br>Reverse: GGCAGAGCTGGTACTTTGGT      |
| <i>Cenpe</i>                | Forward: AAGTTCGGAGAGAGTGCAGC<br>Reverse: TTCCTCGCTTAGGAGCGTTG      |
| <i>Mcm5</i>                 | Forward: CGCCGCTGTGAGGTACA<br>Reverse: TCAGGAACTCCTTGAATCGCC        |
| <i>Smc4</i>                 | Forward: CAGTCGTAACCTGGCCCTCG<br>Reverse: TTCTGGGACCCGCGAATTT       |
| <i>Mcm2</i>                 | Forward: CTCCAAGGCTGGCATCGTTA<br>Reverse: CAAAGCGGGAAATGATGGGC      |
| <i>Mcm3</i>                 | Forward: GGGCACAGTAGTGCTGGATG<br>Reverse: TCCCGAACCTTGTTCTGGTAA     |
| <i>Ccnd2</i>                | Forward: ATTCAGCCAAAGGAAGGAGGTAAG<br>Reverse: ACCACTCGGTCCCGACTGTAA |
| <i>Cox7a1</i>               | Forward: TGCCAGGATCCGGAGTCTTAGAA<br>Reverse: GGTCATTGTTCGGCCTGGAAG  |
| <i>Atp5e</i>                | Forward: TGGACTCAGCTACATCCGGT<br>Reverse: CGTTCGCTTTGAACTCGGTC      |
| <i>Cox6a2</i>               | Forward: GCCCAGAGTTCATCCCGTAT<br>Reverse: AGGATTGACGTGGGGATTGT      |
| <i>Atp5g1</i>               | Forward: CGCTCAGACCAAGGGCTAAA<br>Reverse: CCCTGGTACAGGAGCGAATC      |
| <i>Cox7a2</i>               | Forward: AGAGGACCATCAGCACCCT<br>Reverse: CATCAGATGCCCCGCCTTTC       |
| <i>Cox8b</i>                | Forward: GCCAGCCAAAACCTCCCACTTC<br>Reverse: GCTCTCCAAGTGGGCTAAGA    |
| <i>Cox6c</i>                | Forward: GGCTGGTATCTTTCAGAGTGC<br>Reverse: TAGTTCAGGAGCGCAGGTCA     |
| <i>Ndufa5</i>               | Forward: AAGCTGGATATGGTCAAGGCG<br>Reverse: CTCTTCCACTTCACCACCCT     |
| <i>Ndufs6</i>               | Forward: TTTCGGGGTTCAAGTGTCGC<br>Reverse: CGAACCTCCTGTAGTCTTT       |
| <i>Uqcr10</i>               | Forward: CGCAGAACTTCCACCTTTCG<br>Reverse: CCACAGTTTCCCCTCGTTGA      |
| <i>Uqcrq</i>                | Forward: GCCTTCCCAAGCTATTTTCAGCA<br>Reverse: ACCTGGTTGCCCCATGTGTAG  |
| <i>Vcl</i>                  | Forward: GGTCTAGCAAGGGCAATGAC<br>Reverse: TGAATAAGTGCCCCGCTTGGT     |
| <i>Mmp12</i>                | Forward: TCTGCTGAAAGGAGTCTGCAC<br>Reverse: AGGTTTCTGCTGGGAACCTTCA   |

|                      |                                                                        |
|----------------------|------------------------------------------------------------------------|
| <i>Lgals3</i>        | Forward: TACTAGAAGCGGCCGAGC<br>Reverse: TGTCTGCCATTTTCCTGGGTA          |
| <i>Lrp1</i>          | Forward: CAAAGCTGAAGGCTCCGAGT<br>Reverse: TATGCGGACACTCTCATCGC         |
| <i>Tgfb1</i>         | Forward: TGGAGCAACATGTGGAAGTC<br>Reverse: GTCAGCAGCCGGTTACCA           |
| <i>Tgfb2</i>         | Forward: AGGAGTGGCTTCACCACAAAGACA<br>Reverse: ATTAGACGGCACGAAGGTACAGCA |
| <i>Tgfb3</i>         | Forward: AGCTCTTCCAGATACTTCGACC<br>Reverse: AAAGACAGCCATTCAGCGGT       |
| <i>Timpl</i>         | Forward: CATGGAAAGCCTCTGTGGATA<br>Reverse: CTCAGAGTACGCCAGGGAAC        |
| <i>Postn</i>         | Forward: AGAGAAATCCCTGCACGACA<br>Reverse: GTTGGTGCAAACAAGGTCCA         |
| <i>Bcl2</i>          | Forward: CACCCCTGGTGGACAACATC<br>Reverse: GTTCCACAAAGGCATCCCAGC        |
| <i>Coll1a1</i>       | Forward: TGACTGGAAGAGCGGAGAGTA<br>Reverse: GAGTAGGGAACACACAGGTCT       |
| <i>Col3a1</i>        | Forward: CTGTAACATGGAAACTGGGGAAA<br>Reverse: CCATAGCTGAACTGAAAACCACC   |
| <i>Casp3</i>         | Forward: AGCTTGGAACGGTACGCTAA<br>Reverse: GAGTCCACTGACTTGCTCCC         |
| <i>Casp8</i>         | Forward: GCGTGGAACAGGAAGTGAGTA<br>Reverse: GAAGAGCTGTAACCTGTGGC        |
| <i>Bok</i>           | Forward: CAGCGTATACCGGAACGTGG<br>Reverse: TTGCCCCATGTGATACCTGC         |
| <i>Bak</i>           | Forward: CAAGATCGCCTCCAGCCTATT<br>Reverse: CCCAGGAAGCCGGTCAAAC         |
| <i>Bid</i>           | Forward: CCGCAAACCTTTGCCTTAGC<br>Reverse: AACCGTTGCTGACCTCAGAGT        |
| <i>Bad</i>           | Forward: AAATGGGAACCCCAAAGCAG<br>Reverse: GAACATACTCTGGGCTGCTGG        |
| <i>Puma (Bbc3)</i>   | Forward: GAGACAAGAAGAGCAGCATCG<br>Reverse: TAGTTGGGCTCCATTTCTGG        |
| <i>Bax</i>           | Forward: ACAGGGGCCTTTTTGCTACA<br>Reverse: CACTCGCTCAGCTTCTTGGT         |
| <i>Noxa (Pmaip1)</i> | Forward: ATAAGTGTGGTTCTGGCGCA<br>Reverse: CAATCCTCCGGAGTTGAGCA         |
| <i>Apoa5</i>         | Forward: AACCGAGCAGGGGCCAT<br>Reverse: TAGTCCCAGAGGCTCTTCCG            |
| <i>Pnpla2</i>        | Forward: AATCTCTACCGCCTCTCGAA<br>Reverse: AGGGTTGGGTTGGTTCAGTA         |
| <i>Angptl3</i>       | Forward: TTTGGGAGGCTCGATGGAGAA<br>Reverse: TGCTTGCTGTCTTTCCAGTCT       |
| <i>Angptl4</i>       | Forward: GACTGCCAGGAACTCTTCAA<br>Reverse: GTCCAGCCTCCATCTGAAGT         |
| <i>Lpl</i>           | Forward: TACCCCTAGACAACGTCCA<br>Reverse: CCAGCTGGATCCAAACCAGT          |
| <i>Gpihbp1</i>       | Forward: CACAGCGGAACCGACAAAG<br>Reverse: GACTGGCAACAGGTCTGAGT          |

|              |                                                               |
|--------------|---------------------------------------------------------------|
| <i>Agap1</i> | Forward: AACCTTTGTCGGTTCCGCT<br>Reverse: GACAGAGATACAGCCAGCCG |
|--------------|---------------------------------------------------------------|

### TaqMan probes

| <b>Gene</b>   | <b>TaqMan Assay ID</b> |
|---------------|------------------------|
| <i>Gapdh</i>  | Mm99999915 g1          |
| <i>Vcl</i>    | Mm00447745 m1          |
| <i>Myh7</i>   | Mm0060555_m1           |
| <i>Nppb</i>   | <u>Mm01255770_g1</u>   |
| <i>Nppa</i>   | Mm01255748 g1          |
| <i>Acta1</i>  | Mm00808218 g1          |
| <i>Acta2</i>  | Mm00725412 s1          |
| <i>Atp2a2</i> | Mm00437634 m1          |
| <i>Myh6</i>   | Mm00440354 m1          |
| <i>Myh7b</i>  | Mm01249977 m1          |

## Online Table 2

### Summary of STAR Alignment

| Genotypes                            | Total number of reads | Uniquely mapped reads (N) | Uniquely mapped reads (%) |
|--------------------------------------|-----------------------|---------------------------|---------------------------|
| WT                                   | 56,986,661            | 44,080,962                | 77.35                     |
| WT                                   | 58,592,357            | 45,042,018                | 76.87                     |
| WT                                   | 57,741,248            | 43,997,161                | 76.2                      |
| WT                                   | 47,657,324            | 36,515,508                | 76.62                     |
| WT                                   | 51,350,429            | 36,020,507                | 70.15                     |
| <i>Myh6-Mcm</i>                      | 49,365,176            | 38,120,087                | 77.22                     |
| <i>Myh6-Mcm</i>                      | 55,698,208            | 42,618,724                | 76.52                     |
| <i>Myh6-Mcm</i>                      | 52,784,899            | 37,604,823                | 71.24                     |
| <i>Myh6-Mcm</i>                      | 54,496,135            | 41,523,760                | 76.2                      |
| <i>Myh6-Mcm</i>                      | 62,083,142            | 46,430,324                | 74.79                     |
| <i>Myh6-Mcm:Ctnnb1<sup>LoF</sup></i> | 49,258,626            | 37,285,368                | 75.69                     |
| <i>Myh6-Mcm:Ctnnb1<sup>LoF</sup></i> | 55,434,509            | 43,330,362                | 78.16                     |
| <i>Myh6-Mcm:Ctnnb1<sup>LoF</sup></i> | 56,104,421            | 43,793,695                | 78.06                     |
| <i>Myh6-Mcm:Ctnnb1<sup>LoF</sup></i> | 66,455,498            | 51,492,977                | 77.48                     |
| <i>Myh6-Mcm:Ctnnb1<sup>LoF</sup></i> | 51,960,626            | 41,176,883                | 79.25                     |
| <i>Myh6-Mcm:Ctnnb1<sup>GoF</sup></i> | 57,822,245            | 46,206,202                | 79.91                     |
| <i>Myh6-Mcm:Ctnnb1<sup>GoF</sup></i> | 52,708,415            | 41,106,319                | 77.99                     |
| <i>Myh6-Mcm:Ctnnb1<sup>GoF</sup></i> | 48,100,763            | 37,181,898                | 77.3                      |
| <i>Myh6-Mcm:Ctnnb1<sup>GoF</sup></i> | 48,171,139            | 37,186,377                | 77.2                      |
| <i>Myh6-Mcm:Ctnnb1<sup>GoF</sup></i> | 53,481,970            | 40,409,473                | 75.56                     |

**Abbreviations:** WT: wild type; *Myh6:Mcm*: Myosin heavy chain 6:MerCreMer; Ctnnb1:  $\beta$ -catenin;

LoF: Loss-of-function; GoF: Gain-of-function.

Data in the WT and *Myh6-Mcm* groups are from Rouhi et al. <sup>33</sup>
